# Supplementary material for: Low-temperature storage after harvest retards the deterioration in the sensory quality, health-promoting compounds, and antioxidant capacity of baby mustard
Source: Royal Society of Chemistry journal article supplement (doi:10.1039/d0ra07177c), 2020-01-01
Supplement: d0ra07177c1.pdf [file d0ra07177c1.pdf]

### Supplementary figure 1

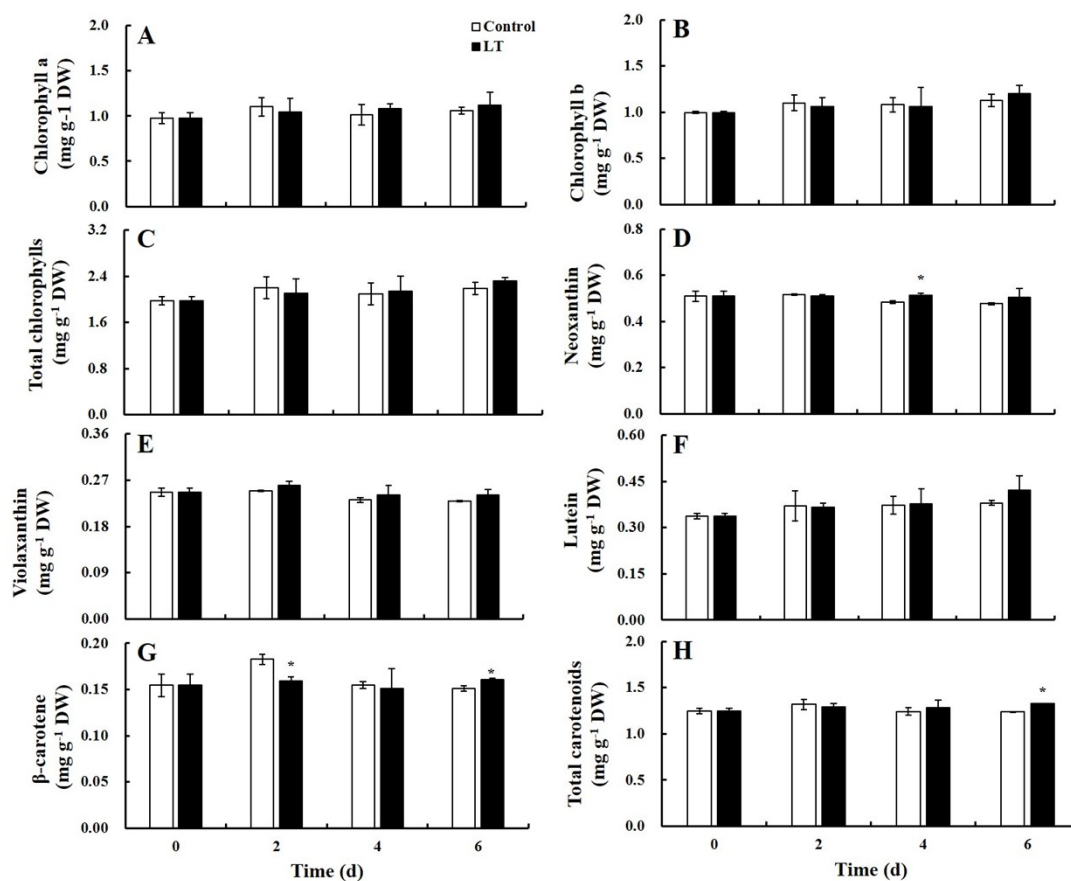

Supplementary Fig. 1 Changes in chlorophyll and carotenoid contents of baby mustard lateral buds at room temperature (20 °C, control) and low temperature (4 °C, LT) during storage. Asterisks indicate significant differences between the LT treatment and the control at the same time point ( $p < 0.05$ ).
