# Supplementary material for: Low-temperature storage after harvest retards the deterioration in the sensory quality, health-promoting compounds, and antioxidant capacity of baby mustard
Source: Royal Society of Chemistry journal article supplement (doi:10.1039/d0ra07177c), 2020-01-01
Supplement: d0ra07177c2.xlsx [file d0ra07177c2.xlsx]

## Sheet: Sheet1
Supplementary Table 1 Correlation between the sensory and nutritional qualities in lateral buds of baby mustard
	Score	Weight loss	Firmness	L-upper	L-lower	a-upper	a-lower	b-upper	b-lower	Fructose	Glucose	Sucrose	Total soluble sugars	Chlorophyll a	Chlorophyll b	Total chlorophylls	Neoxanthin	Violaxanthin	Lutein	beta-carotene	Total carotenoids	Ascorbic acid	Proanthocyanidins	Flavonoids	Total phenolics	FRAP	ABTS	Glucoiberin	Progoitrin	Sinigrin	Glucoalyssin	Gluconapin	4-Hydroxy glucobrassicin	Glucobrassicin	4-Methoxyglucobrassicin	Neoglucobrassicin	Total aliphatic gulcosinolates	Total indole gulcosinolates
Score	1
Weight loss	-0.976386	1
Firmness			1
L-upper				1
L-lower					1
a-upper						1
a-lower			0.908291				1
b-upper								1
b-lower	-0.976831	0.932603							1
Fructose	0.940563	-0.950137	0.933242						-0.953465	1
Glucose	0.938047	-0.976569							-0.907176	0.936218	1
Sucrose		0.904221									-0.911936	1
Total soluble sugars	0.954274	-0.958346							-0.96742	0.988036	0.963081		1
Chlorophyll a														1
Chlorophyll b															1
Total chlorophylls														0.950461	0.967512	1
Neoxanthin																	1
Violaxanthin																		1
Lutein															0.962313	0.949534			1
beta-carotene																				1
Total carotenoids																					1
Ascorbic acid	0.967542	-0.989082							-0.905286	0.908015	0.956092		0.925897									1
Proanthocyanidins																							1
Flavonoids	0.962788	-0.993009	0.900993						-0.932678	0.971527	0.983204		0.978076									0.975102		1
Total phenolics																									1
FRAP	0.932426	-0.936336	0.971935						-0.934127	0.988885	0.905269		0.963821											0.956584		1
ABTS	0.964542	-0.981269							-0.940307	0.931233	0.983557		0.963845									0.971343		0.977294			1
Glucoiberin	0.9541	-0.945677	0.920586						-0.944853	0.954711	0.941329		0.972675									0.935744		0.963446		0.954846	0.935697	1
Progoitrin																													1
Sinigrin	0.969136	-0.980789	0.933872						-0.936668	0.966327	0.962389		0.968284									0.964876		0.987382		0.9712	0.949471	0.981895		1
Glucoalyssin	0.971791	-0.940964							-0.916801		0.901832						0.926474					0.961281		0.91431			0.931192	0.925924		0.933792	1
Gluconapin	0.969074	-0.949532	0.926524						-0.96755	0.972798	0.929487		0.970198									0.917198		0.95804		0.979026	0.922548	0.974247		0.982121	0.915019	1
4-Hydroxy glucobrassicin	0.928456	-0.934203	0.951332							0.927519	0.906587		0.915179									0.917007		0.941658		0.959053		0.957521		0.981123	0.903641	0.969533	1
Glucobrassicin	0.988384	-0.972863							-0.971879	0.949023	0.939744		0.967606									0.971737		0.970034		0.93516	0.970537	0.96976		0.967845	0.957863	0.956518	0.915028	1
4-Methoxyglucobrassicin	0.938651	-0.953199	0.934453							0.923214	0.931961		0.923117									0.946853		0.95832		0.946047	0.904755	0.967621		0.988225	0.927495	0.961093	0.993931	0.933016	1
Neoglucobrassicin	0.960812	-0.971475	0.923478						-0.900546	0.923128	0.930792		0.919802									0.969772		0.964667		0.943237	0.920726	0.954812		0.98741	0.949424	0.958319	0.983723	0.950379	0.991909	1
Total aliphatic gulcosinolates	0.970352	-0.981179	0.932452						-0.937709	0.965779	0.962428		0.967979									0.965316		0.987135		0.97062	0.949985	0.981586		0.999979	0.935509	0.982589	0.981121	0.968284	0.988159	0.987768	1
Total indole gulcosinolates	0.968607	-0.973214	0.933112						-0.9243	0.943807	0.942873		0.945736									0.967454		0.973869		0.95827	0.933608	0.977302		0.995768	0.949984	0.974418	0.986355	0.964906	0.994097	0.996008	0.995944	1
Total gulcosinolates	0.970442	-0.980995	0.932641						-0.937276	0.964971	0.961727		0.96716									0.965577		0.986717		0.97024	0.949423	0.981565		0.999964	0.936311	0.982396	0.981522	0.968301	0.988592	0.988302	0.999992	0.996295
